# Supplementary figures and images for: Three interacting regions of the Ndc80 and Dam1 complexes support microtubule tip-coupling under load
Source: PubMed Central journal article supplement — J Cell Biol. 2022 Mar 30;221(5):e202107016. doi: 10.1083/jcb.202107016 (PMC8972186; doi:10.1083/jcb.202107016), 2022-03-30

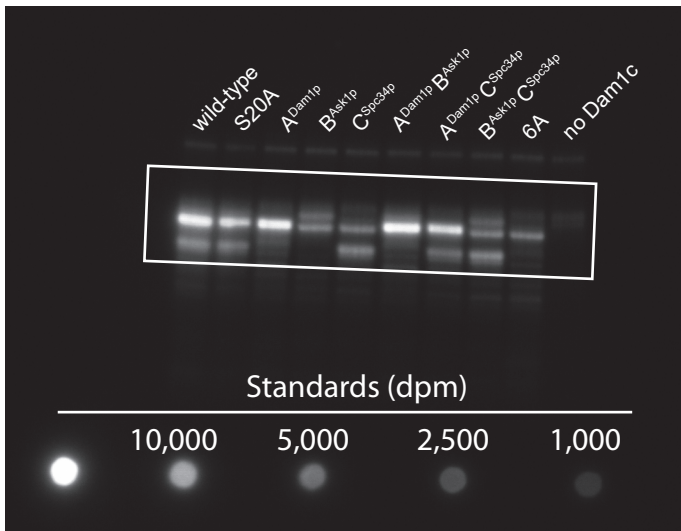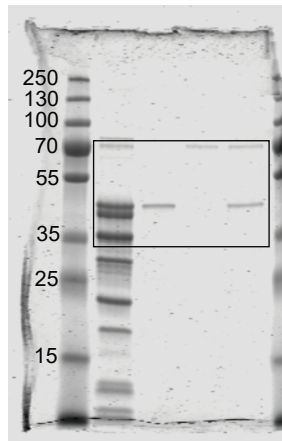

Supplement: JCB_202107016_SourceDataFS3.pdf [file JCB_202107016_SourceDataFS3.pdf]
